# Supplementary material
Source: PubMed Central journal article supplement (PMC5111722)
Supplement: pnas.1609409113.sapp.pdf [file pnas.1609409113.sapp.pdf]

# Supplementary Information (SI) for article: Herbivore teeth predict climatic limits in Kenyan ecosystems

Indrė Žliobaitė<sup>a,b,1</sup>, Janne Rinne<sup>a,c</sup>, Anikó B. Tóth<sup>d,e</sup>, Michael Mechenich<sup>a</sup>, Liping Liu<sup>f</sup>,  
Anna K. Behrensmeier<sup>d</sup>, and Mikael Fortelius<sup>a,g,h</sup>

<sup>a</sup>Department of Geosciences and Geography, University of Helsinki, P.O. Box 64, FI-00014 University of Helsinki, Finland; <sup>b</sup>Helsinki Institute for Information Technology HIIT, Aalto University, PO Box 15600, FI-00076 Aalto, Finland; <sup>c</sup>Department of Physical Geography and Ecosystem Science, Lund University, Sölvegatan 12, S-22362 Lund, Sweden; <sup>d</sup>Evolution of Terrestrial Ecosystems Program, Department of Paleobiology, MRC 121, National Museum of Natural History, Smithsonian Institution, Washington, D.C. 20013 USA; <sup>e</sup>Department of Biological Sciences, Macquarie University, NSW 2109 Sydney, New South Wales, Australia; <sup>f</sup>Department of Paleobiology, Swedish Museum of Natural History, P.O. Box 50007, SE-11418, Stockholm, Sweden; <sup>g</sup>Centre for Ecological and Evolutionary Synthesis, Dept. of Biosciences, University of Oslo, P.O. Box 1066 Blindern, NO-0316 Oslo, Norway; <sup>h</sup>Museum of Natural History, Invalidenstrasse 43, 10115, Berlin, Germany

This manuscript was compiled on September 30, 2016

## Materials and methods

**Study area and environmental characteristics.** We use data spanning the past 60 years from 13 Kenyan National parks. The protected areas of the national parks and their basic environmental characteristics are listed in Table 1. The protected areas, or sites, cover a range of climatic conditions, from hot and dry, e.g., Tsavo, to moist and cool, e.g. Aberdares. While rainfall in Kenya is mostly dependent on elevation, there are other factors influencing it such as proximity to the Indian Ocean, rain shadow effects on lee sides of major mountains, and the generally higher rainfall rates in the west, close to the Congo basin. In our dataset the NDVI, i.e. the greenness of the vegetation, depends mostly on rainfall.

The climate variables included in this study are temperature (TEMP) and precipitation (PREC). These data were obtained from WorldClim [1] and represent interpolated and averaged observations from year 1950 to 2000, roughly the same period (1950-2012) represented by the mammal occurrence data.

Net primary productivity (NPP) is computed from temperature and precipitation using the classic formula from [2], as cited in [3]. The formula computes NPP components from temperature and precipitation separately, and then takes the minimum of the two. As our study domain lies in low latitudes, the NPP varies mostly due to precipitation, except for high (above 2500 m) elevation sites (ABD, EL, MKE), where NPP is due to temperature in accordance with the findings in [4], which demonstrate that in colder areas the NPP depends mostly on temperature while in warmer areas it depends on precipitation.

Normalized difference vegetation index (NDVI) indicates the amount of live green vegetation as observed via remote sensing. NDVI is calculated from satellite observations as difference between reflected near-infrared and visible radiation, normalized by dividing with their sum [5]. In this study the spatial and temporal average observed index for each national park is calculated over nine years (2001-2009) using observations available at every 16 days.

In addition to average TEMP, PREC, NPP and NDVI we compute extremities of these variables (minimums and maximums) expecting to capture short and longer term limiting conditions for productivity, that is, the availability of high-quality plant foods. Due to nature of the data sources not all variants are possible for all variables, but where possible we at computing extreme values over different time spans as

**Table 1. National park sites and their characteristics. For productivity NPP (P) indicates that the value is mostly precipitation controlled, and (T) indicates that it is mostly temperature controlled.**

| Site name    | Area km <sup>2</sup> | Elev. m | Temp. C | Prec. mm | NPP gC/m <sup>2</sup> | NDVI | Spec. count |
|--------------|----------------------|---------|---------|----------|-----------------------|------|-------------|
| Aberdares    | 1930                 | 2712    | 11.9    | 1656     | 1576 (T)              | 0.71 | 23          |
| Elgon        | 733                  | 2504    | 15      | 1606     | 1846 (T)              | 0.68 | 17          |
| Kakamega     | 540                  | 1793    | 18.8    | 1779     | 2079 (P)              | 0.75 | 20          |
| Masai Mara   | 1520                 | 1601    | 19.5    | 1038     | 1494 (P)              | 0.53 | 35          |
| Meru         | 5090                 | 421     | 25.6    | 430      | 745 (P)               | 0.37 | 38          |
| Mt Kenya     | 2600                 | 2686    | 12.4    | 1594     | 1620 (T)              | 0.63 | 23          |
| Nairobi      | 66                   | 1628    | 19      | 742      | 1167 (P)              | 0.42 | 31          |
| Naivasha     | 119                  | 1974    | 16.7    | 709      | 1126 (P)              | 0.46 | 31          |
| Samburu      | 424                  | 883     | 23.6    | 504      | 853 (P)               | 0.3  | 29          |
| Shimba Hills | 224                  | 242     | 24.5    | 1102     | 1557 (P)              | 0.62 | 20          |
| Shompole     | 183                  | 1120    | 22.6    | 567      | 941 (P)               | 0.54 | 29          |
| Tana         | 560                  | 77      | 27.3    | 508      | 859 (P)               | 0.39 | 37          |
| Tsavo        | 20210                | 544     | 24.5    | 714      | 1133 (P)              | 0.34 | 35          |

well as spatially. Over time we look at monthly, monthly, yearly and 9 years (only possible for NDVI) extremes with the goal to analyze dental traits in relation to variability of the environment.

**Data sources.** Ecometric modeling requires three types of data: environmental characteristics of sites, dental traits of species, and occurrence-of-species at sites. We use environmental and occurrence-of-species data covering the last 60 years from 13 protected areas (sites) of national parks in Kenya. Our study area covers a relatively small spatial scale (34 thousand km<sup>2</sup>), which is not meant to generalize on a continental scale, but it offers very precise lists of species occurrence, which allows for very accurate analysis as compared to global scale possibilities.

Data used in our analysis originate from several sources: presence-absence of species with body masses, as well as temperature and elevation of the sites, are from [6], updated presence-absence data were received from A. Tóth, temperature originally obtained from WorldClim [1], body mass obtained from Pantheria [7] and the MOM database [8]. Precipitation data are from WorldClim [1]. Dental traits (functional

<sup>1</sup>To whom correspondence should be addressed. E-mail: indre.zliobait@helsinki.fi

crown types) are newly developed for this study. Hypsodonty values are obtained from [3], completed and amended by one of the authors (MF). The Net Primary Productivity (NPP) was calculated from WorldClim data. The Normalized Difference Vegetation Index (NDVI) is a remote sensing product downloaded from NASA Earth Observations website<sup>1</sup>.

The climate data have been processed as follows. First, WorldClim global temperature and precipitation data were obtained in grid format. These grids were then converted to vector polygon format, and intersected with polygons representing the parks included in this study. Finally, from these intersections, summary climatic values, including spatial minimums and area-weighted averages, were calculated for each park.

From the original species distribution reported in [6] we include only orders Proboscidea, Primates, Perissodactyla, and Artiodactyla, following [9] and subsequent publications on ecometrics (see [10] for a recent review), the main orders of large herbivores. We exclude domestic species (*Bos Taurus*, *Capra hircus*, *Ovis aries*, *Camelus dromedaries*, *Equus asinus*, *Equus caballus*) from the analysis. Table 5 reports the numbers of species found in each protected area.

The dental traits of large herbivorous mammal species occurring in Kenya national parks used in this study have been scored (by MF) according to the new FCT scheme. The scores are given in Table S1 in Supporting Information.

**Regression models.** We build upon work by Liu et al [3], where an ecometric regression model was developed for estimating Net Primary Productivity (NPP) using dental functional traits (molar height and the number of longitudinal lophs). The model built as Ordinary Least Squares (OLS) regression explained about 73% of the global variance in the land productivity.

Figure 1 illustrates our modeling procedure. From species occurrence data and dental trait data we compute average traits for each site. Then we relate these average traits to the climate and environmental characteristics of each site by models fit on modern day data. The resulting regression model can be applied to fossil record to predict climate and environmental conditions in the past.

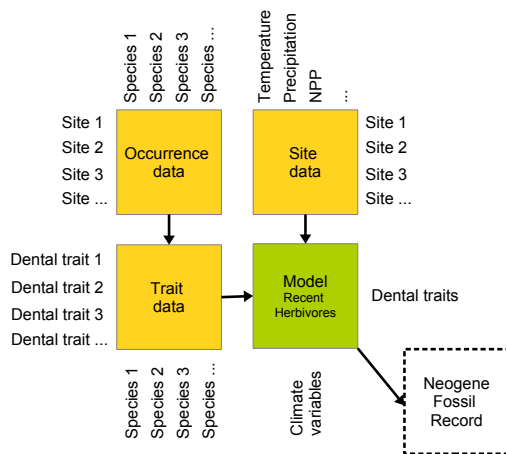

Fig. 1. Modeling procedure.

We have a small sample size (13 sites) and many dental traits to consider, therefore, to control the risk of rather than capturing generic patterns to capture once-off deviations due to models being too flexible, we restrict our analysis to simple linear models. Instead of the standard OLS regression for model fitting, we use Least Angle Regression (LARS) [11], which is better suited for high dimensional data (relative to the number of observations) with correlated predictors. We use LARS with dental traits as inputs to predict each environmental variable separately. The resulting models from LARS look like normal linear regression equations, but the procedure for obtaining these equations is special.

LARS constructs a model iteratively. First a predictor is selected that is the most correlated with the target variable. A one-variable regression model is fitted. Instead of using the regression coefficient in full, a small fraction of the coefficient is used, estimates are made using this regression model and residuals are computed. The procedure is repeated and the utilization of the regression coefficient is increased until the next predictor becomes more correlated with the residual. The procedure continues until a stopping criterion is met, in our case - a user defined number of selection steps is reached. The optimal number of steps is either fixed a priori, or selected via leave-one-out cross validation (LOOCV).

We use leave-one-out cross-validation (LOOCV) procedure for optimizing model parameters and analyzing the performance on unseen data. The procedure is as follows. Having a dataset of  $n$  observations (sites), one observation is removed from the dataset, a model is built on the remaining  $n-1$  observations, and a prediction is made on the omitted observation. The same procedure is repeated for all  $n$  observations. This way testing is done on all the observations in the dataset while not using those observations in model building. This allows more objective assessment of the performance.

In addition to LARS, for comparison purposes we report the standard OLS regression performance on log-mass alone, and the number of species alone, and the seven dental traits plus log-mass.

We use the coefficient of determination ( $R^2$ ) for assessing the predictive performance, since it gives a standardized score that is easy to interpret.  $R^2$  takes values between minus infinity and one, the higher - the better. If tested on the same data as the model was fitted, zero means that the performance is the same as a naive baseline always predicting a constant. When using  $R^2$  with cross-validation, we need to normalize the score as otherwise the naive baseline is below zero (for details see [12]). The normalization depends only on the number of data points in cross-validation, and is  $R^{2*} = (R^2 - R_{naive}^2) / (1 - R_{naive}^2)$ , where  $R_{naive}^2 = 1 - n^2 / (n - 1)^2$ .

**Data accessibility and implementation of computational experiments.** The data and the code for reproducing the computational experiments reported in this study are available online<sup>2</sup>. In addition, for visual reference the datasets are given in Supplementary Information. Computational experiments are implemented and executed in R<sup>3</sup>. We use the implementations of Least Angle Regression (LARS) provided in R package `lars`<sup>4</sup>.

<sup>2</sup><https://github.com/zliobaite/paper-Kenya-parks>

<sup>3</sup><https://www.r-project.org/>

<sup>4</sup><https://cran.r-project.org/web/packages/lars/index.html>

<sup>1</sup>[http://neo.sci.gsfc.nasa.gov/view.php?datasetId=MOD13A2\\_M\\_NDVI](http://neo.sci.gsfc.nasa.gov/view.php?datasetId=MOD13A2_M_NDVI)

## Functional Crown Type (FCT) scoring scheme

Jernvall [13] introduced a modular system called crown types to describe the topography of all developing and unworn mammalian molar teeth. While the original crown type scheme has proven useful for capturing the functional evolution of the teeth of mammalian herbivores (e.g., [3, 13, 14]), it is not ideal for capturing the functional competence of herbivore teeth, created and maintained by dental wear. Here we introduce a system of functional crown types explicitly designed for capturing molar shape and main functional traits of worn occlusal surfaces of the molar dentition. The system has been designed to be generally applicable to all living and fossil herbivorous mammals, regardless of phylogenetic relationships, size or design of the chewing apparatus.

**Scoring scheme.** Our scheme has seven variables, two ordinal and five binary:

- hypsodonty (HYP)
- horisodonty (HOD)
- presence of acute lophs (AL)
- presence of obtuse or basin-like lophs (OL)
- structural fortification of cusps (SF)
- occlusal topography (OT)
- coronal cementum (CM)

The scoring system is as follows:

- HYP: brachydont (1), mesodont (2), hypsodont (3)
- HOD: brachyhorisodont (1), mesohorisodont (2), hypsohorisodont (3)
- AL: absent (0), present (1)
- OL: absent (0), present (1)
- SF: absent (0), present (1)
- OT: has raised elements (0), is flat (1)
- CM: absent or very thin (0), thick coating (1)

Hypsodonty definition = a tooth lower than long is brachydont, teeth of approximately equal length and height are mesodont, teeth distinctly taller than long are hypsodont. Non-binding guidelines based on this ratio: brachydont  $\leq 0.8$ , mesodont  $0.8-1.2$ , hypsodont  $> 1.2$

Horisodonty definition = a hypsohorisodont tooth is distinctly elongated in the mesiodistal (anteroposterior) direction. The number of cusp pairs in this dimension is a good guideline. 1-2 cusp pairs indicates brachyhorisodonty, 3 cusp pairs indicates mesohorisodonty and 3 or more cusp pairs indicates hypsohorisodonty. Cusplets distinctly smaller than the main cusp pairs are not counted.

Loph definition = a loph is a continuous, straight, zig-zagged, curved or undulating continuous structure consisting of one or two enamel crests or a row of separate cusps with elongated features closely spaced. A loph has occlusal enamel-enamel contact but planar facets are not required. A loph is at least half the size of the tooth along the main axis of the loph.

Loph shape = acute has a single, distinct edge, obtuse does not. A loph is only acute if the leading enamel itself forms a sharp edge, or supports a distinct, planar wear facet. If in doubt, go for obtuse. Acute lophs are seen in tapirs, chalicotheres, brachydont horses, ectolophodont rhinos, deinotheres, some monkeys. Selenodont lophs are scored as obtuse and the differences are recorded under occlusal topography.

Fortified cusps = a structure amplifying the protrusion of a cusp, as in reduncine bovinds. There must be some clear

sign of fortification, such as Furchen (e.g., most suids) or locally thickened enamel loops (e.g. hippos and various bovids). Regular selenodont cusps are not fortified.

Occlusal topography = either with raised cusps/lophs or fused into a single surface essentially in one plane, often with cusps/lophs embedded in thick cementum. Examples include plagiolophodont horses and rhinos, elephantids, warthogs, many rodents. Modern Bovini, and Alcelaphini have a flat occlusal topography but most other bovids have raised elements. Occlusal topography is a property determined mainly by dental structure, rather than the diet of the individual. In contrast to the relief variable of traditional mesowear analysis, it is assessed perpendicular to the direction of occlusal movement (the direction least sensitive to dietary effects). Where occlusal movement is minor, any direction will do.

Cementum = presence of cementum on the crown (as well as on the roots). Very thin cementum is scored as absence, mainly because it is often impossible to tell these states apart on fossil specimens. Thick cementum means that cementum thickness is of the same order of magnitude as enamel thickness.

Examples are given in Figure 2.

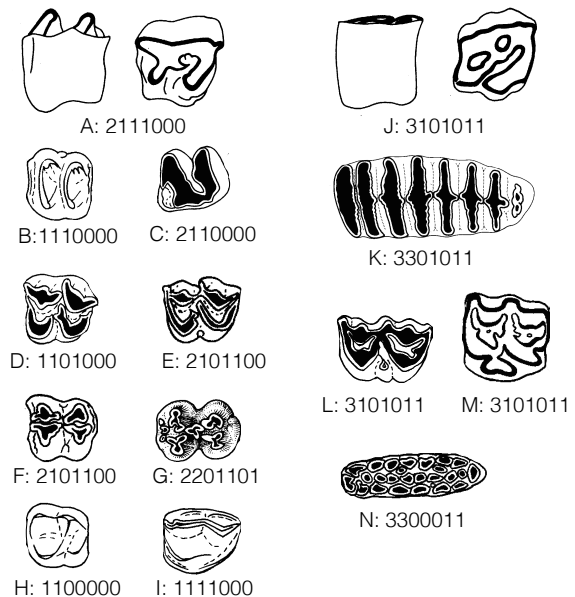

**Fig. 2.** Drawings of selected molars to illustrate the scoring system of functional crown types. The numbers indicate the sequence of crown type scores (HYP, HOD, AL, SF, OT, CM). A and J show the principal difference between an occlusal surface with raised elements. The left column shows additional examples where the occlusal surface is scored as having raised elements, the right one shows examples where it is scored as flat. Note that selenodont teeth can have both states (E, D versus L). All teeth shown are brachyhorisodont except K and N, which are hypsohorisodont. The genera shown are: A *Diceros*, B *Listriodon*, C *Arsinoitherium*, D *Giraffa*, E *Cervus*, F *Hippopotamus*, G *Hylochoerus*, H *Pan*, I *Megaladapis*, J *Ceratotherium*, K *Loxodonta*, L *Bos*, M *Equus*, N *Phacochoerus*. A and J are from [15], all other examples from [16].

**Scoring guidelines.** The general spirit of this scoring system is to concentrate on the obvious structures and ignore minor structures and nuances.

The default tooth is upper M2, for practical as well as developmental reasons [17], but when some other tooth is clearly more characteristic the other tooth is used (P4 for most carnivores, M3 for many derived pigs). The philosophical

principle is that M2 should always be used when it doesn't matter. When it makes a significant difference, the dominant tooth should be used. The purpose is always to capture the significant traits of the entire molar dentition. Whenever possible, multiple specimens should be investigated.

Wear may influence the scoring and teeth in early middle wear should be used if possible. Unworn or little worn teeth and very worn teeth are disqualified.

### Analysis of indicator species

From the ecometric analysis it looks like distribution of the functional dental traits over sites is capturing two characteristic environmental conditions in Kenya: (1) precipitation related wetlands, which are species-rich, while have relatively low precipitation, with other water sources, such as rivers or lakes, available, and (2) temperature related galley forests, which are cooler spots within extremely hot and dry surroundings.

To find out what is the dental signature for wetlands we select two indicator species and investigate in what kind of sites they occur, and in what kind of sites they do not occur. We look at hippos and reduncines, which are known to inhabit wetlands. Our dataset includes only one species of hippos (*Hippopotamus amphibius*) and three species of reduncines (*Redunca fulvorufula*, *Redunca redunca*, and *Kobus ellipsiprymnus*). Out of reduncines *Redunca fulvorufula* occurs only in two sites, and *Kobus ellipsiprymnus* occurs in all but one sites. Lack of variability in occurrence would mask the pattern, thus we pick *Redunca redunca*, which occurs in about half of the parks.

Hippo is found in 8 parks out of 13, redunca in 7 out of 13. Among those 5 parks overlap. Even though hippo and redunca are not found in exactly the same parks, the signatures of the parks where they are found vs. not found are highly similar, and how these characteristics deviate from the mean is also highly similar, as Figure 3 shows.

Environment-wise hippos and reduncas are clearly in places with high above-average species counts, with low precipitation, hence low NPP, also low NDVI places. With hotter temperatures than average, especially for hippos. Both occur in below average elevations, especially hippos.

Trait-wise hippos and reduncas occur in high above average hypsodonty (and cementum) sites, with high above average obtuse lophs (OL), below average acute lophs (AL), and with indeed lower than average structural fortification (SF), which is due to species count, as discussed in the main manuscript text.

To find out what is the dental signature for forests we select three indicator species expected to be found in forests: *Hylochoerus meinertzhageni*, *Galago senegalensis*, and *Tragelaphus imberbis*. Interestingly, all three are nocturnal animals that tend to hide from daily heat in trees.

*Hylochoerus meinertzhageni* is native to wooded habitats. The giant forest hog is mainly a herbivore, but also scavenges. *Galago senegalensis* tend to live in dry woodland regions and savannah regions. They are omnivores, eating birds and insects, fruit, seeds, flowers, eggs, nuts, and tree gums. *Tragelaphus imberbis* - is a forest antelope, it inhabits dry, flat, and heavily forested regions, and eats foliage from trees and shrubs.

*Hylochoerus* present in 6, Galago in 9, out of those 5 overlap. *Tragelaphus* occur in 5 sites, out of which only 2 overlap with *Hylochoerus*, and 4 overlap with *Galago*. Based on inspection

of the site characteristics, *Hylochoerus* tend to occur in classical forests, while *Tragelaphus* occurs in galley forests near water sources at extremely hot and dry areas. Figure 4 summarizes site characteristics for these species occurrence.

*Hylochoerus* present in very humid places, *Galago* in a bit drier than average, *Tragelaphus* in very dry. *Hylochoerus* in colder than average, *Galago* and *Tragelaphus* in highly hotter than average. Out of those, *Tragelaphus* has hotter maximums, and higher difference between max hot and average hot. Species count does not matter for *Hylochoerus*, *Galago* is in high species, *Tragelaphus* in very high species. Elevation-wise *Hylochoerus* is high, *Galago* and *Tragelaphus* are low.

In terms of the dental signature *Hylochoerus* and *Galago* are in slightly low hypsodonty (HYP) sites, but not very distinctly. For *Tragelaphus* HYP does not matter much. *Hylochoerus* is in sites with high acute loph (AL) scores, for *Galago* and *Tragelaphus* AL do not seem to matter much. Both *Hylochoerus* and *Galago* are in low obtuse loph (OL) sites, for *Tragelaphus* OL do not matter much. *Hylochoerus* is in high structural fortification (SF) sites, *Tragelaphus* is in low SF, while *Galago* is middle range SF. Cementum does not matter for either.

It seems that for *Tragelaphus* only HOD and SF matters - high HOD, low SF. They live in extremely hot and extremely low rain. Looking at the map, these parks: MR, SB, SHP, TV, TV. These look mostly like galley forests, rivers in deserts, see the map in Figure 5, as well as most of the seasonal rivers are there.

### Datasets

The data and the code for reproducing the computational experiments reported in this study is available online<sup>5</sup>. For visual reference the datasets are given in Tables 3, 4, 5.

### Abbreviations used

Table 2 presents abbreviations used. All the climate and environmental variables are given in Table 6.

**Table 2. Abbreviations and acronyms.**

|      |                                        |
|------|----------------------------------------|
| FCT  | Functional Crown Types                 |
| HYP  | Hypsodonty                             |
| AL   | Acute Lophs                            |
| OL   | Obtuse, or basin-like Lophs            |
| SF   | Structural Fortification               |
| OT   | Occlusal Topography                    |
| CM   | Coronal Cementum                       |
| OLS  | Ordinary Least Squares                 |
| LARS | Least Angle Regression                 |
| PREC | Precipitation                          |
| NPP  | Net Primary Productivity               |
| NDVI | Normalized Difference Vegetation Index |
| TEMP | Temperature                            |

<sup>5</sup><https://github.com/zliobaite/paper-Kenya-parks>

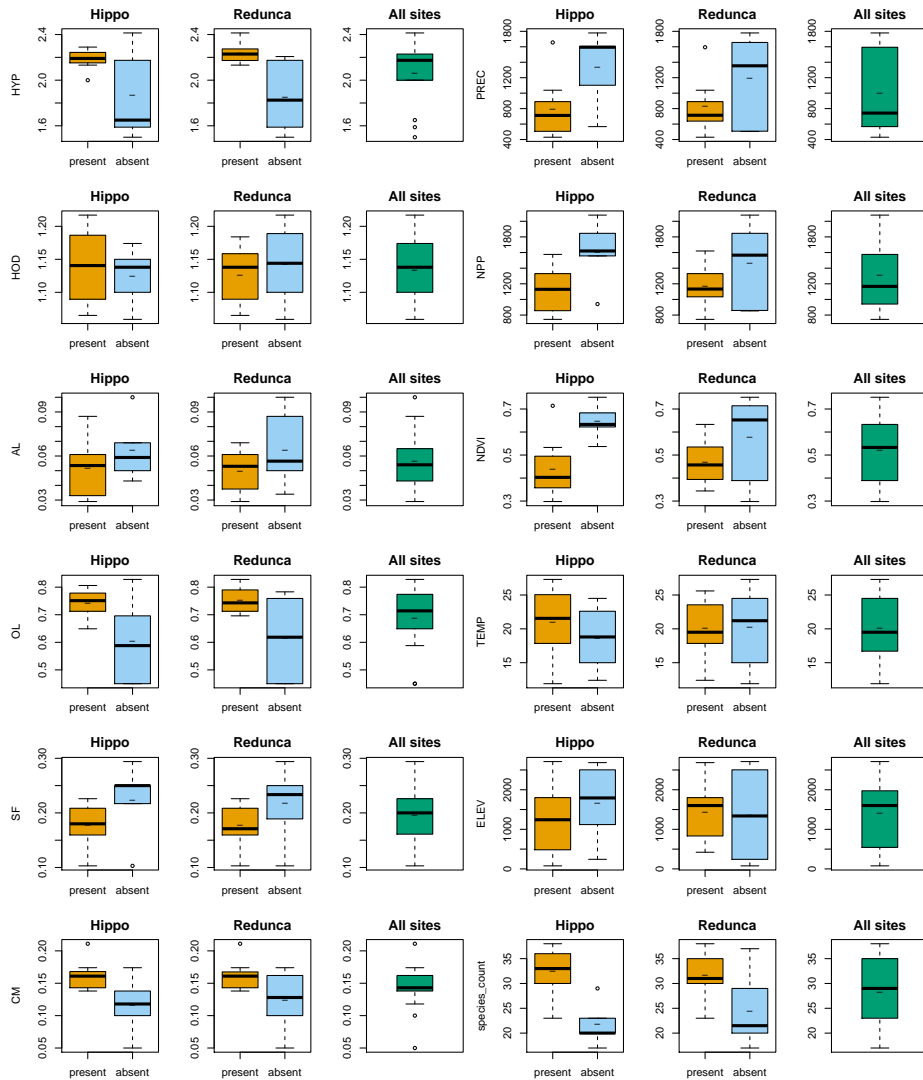

**Fig. 3.** Environment characteristics and dental trait characteristics of sites where *emphHippopotamus amphibius*, and *Redunca redunca* occur.

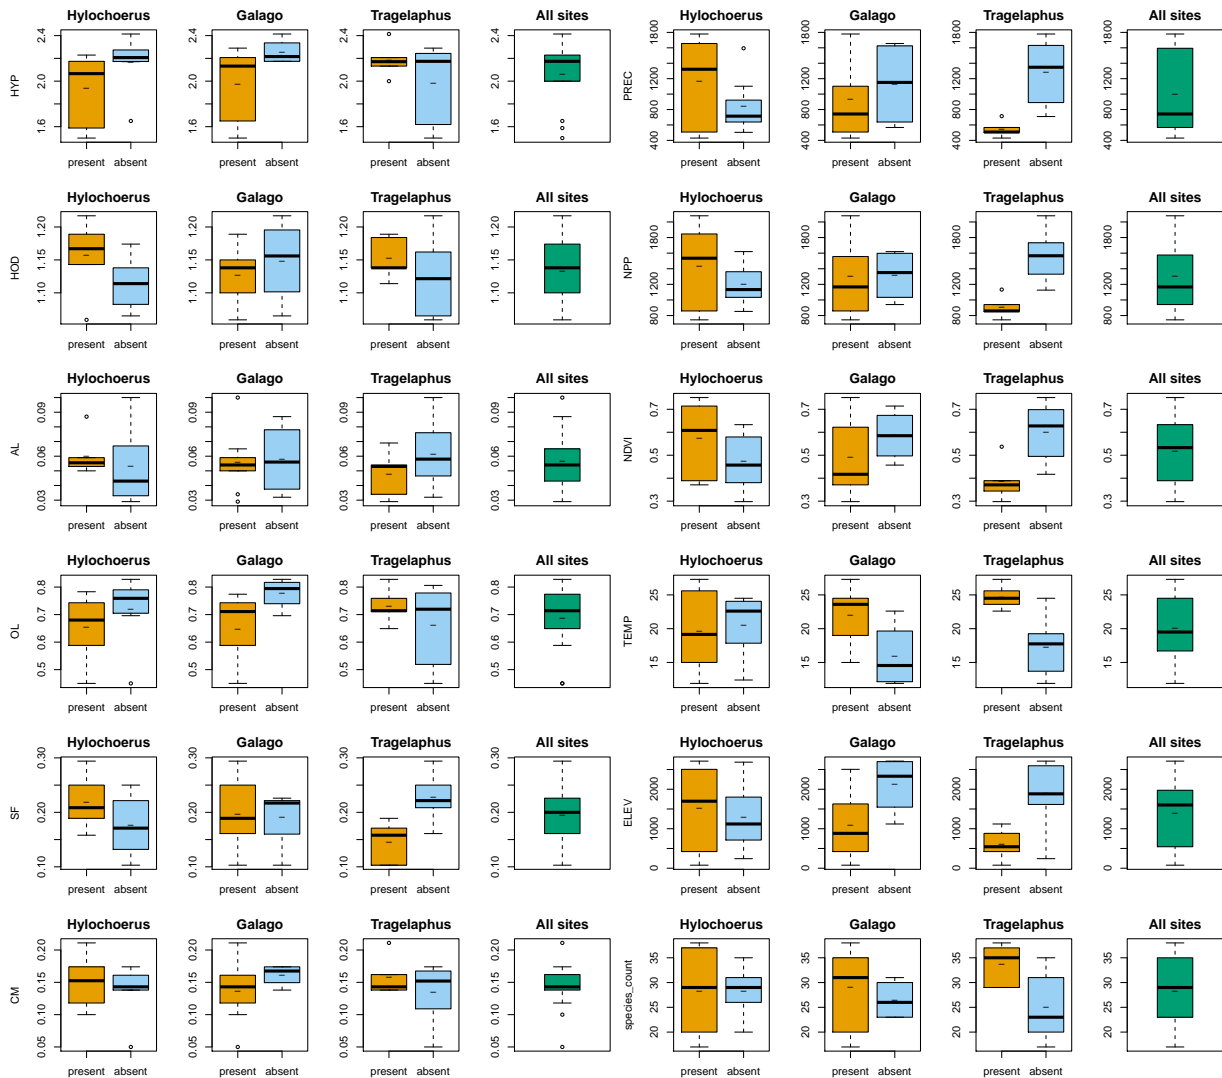

Fig. 4. Environment characteristics and dental trait characteristics of sites where *Hylochoerus meinertzhageni*, *Galago senegalensis*, and *Tragelaphus imberbis* occur.

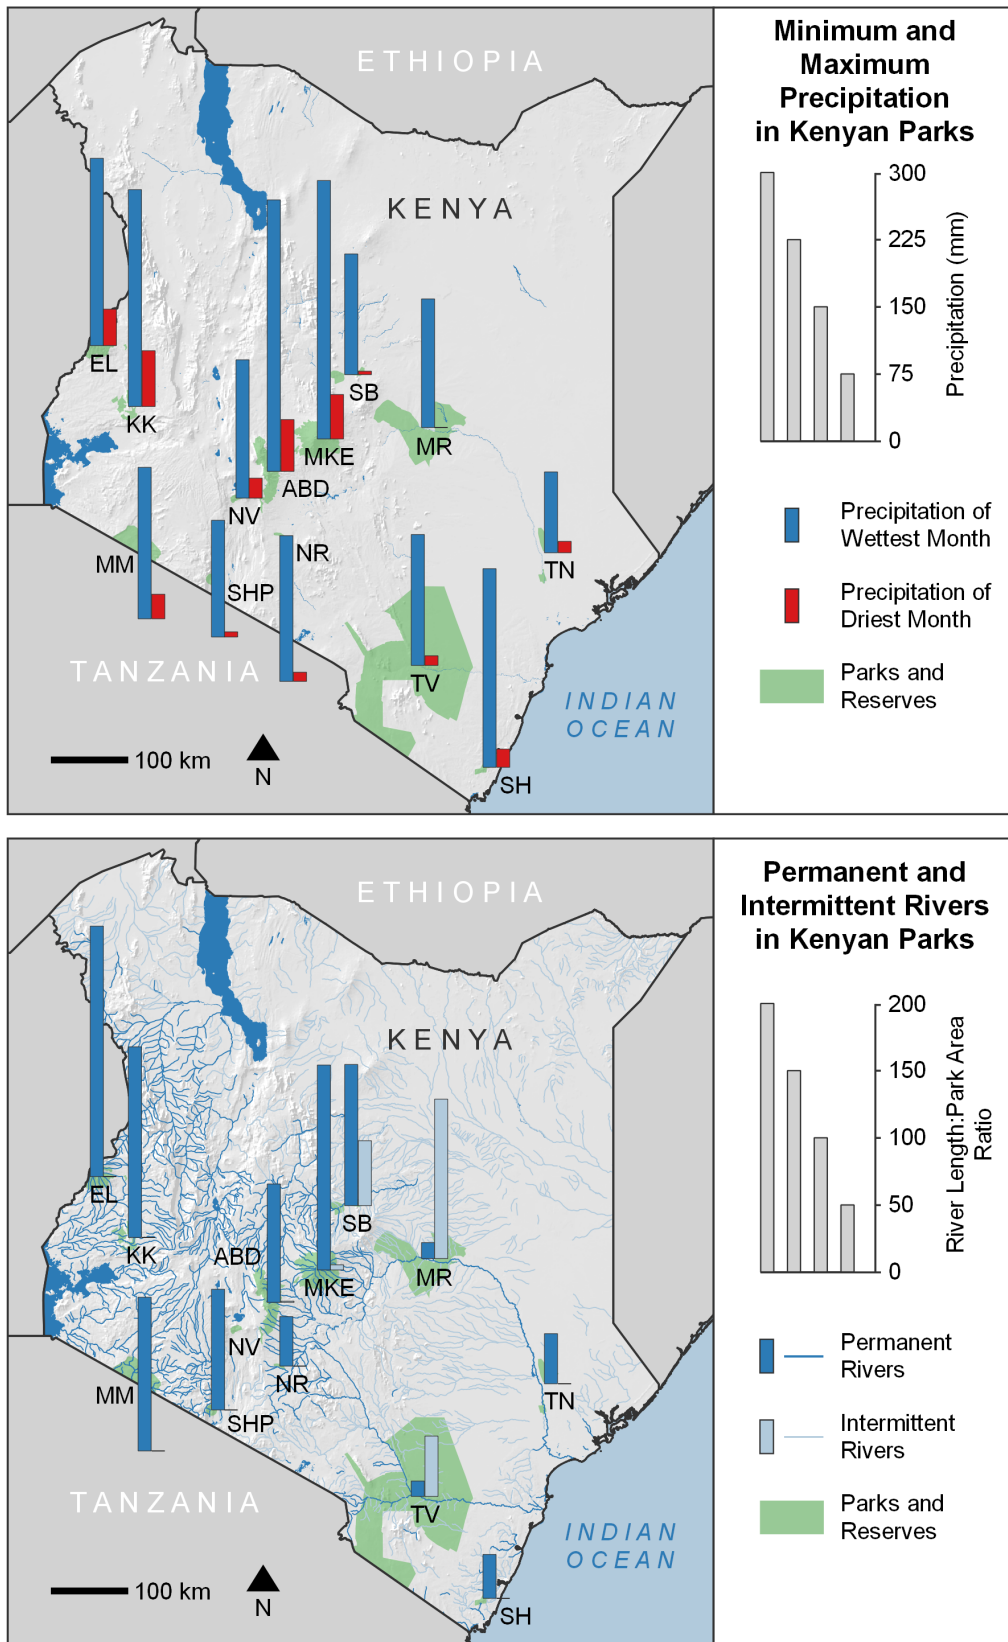

**Fig. 5.** Permanent and seasonal rivers and precipitation on sites. The vertical bars indicate the length of rivers relative to the park area, and relative amount of annual precipitation for comparison purposes.

Table 3. Dental traits and mass data.

| TAXON                             | ORDER          | FAMILY          | MASS_KG | HYP | HOD | AL | OL | SF | OT | CM |
|-----------------------------------|----------------|-----------------|---------|-----|-----|----|----|----|----|----|
| <i>Aepyceros melampus</i>         | Artiodactyla   | Bovidae         | 52.5    | 3   | 1   | 0  | 1  | 0  | 0  | 0  |
| <i>Alcelaphus buselaphus</i>      | Artiodactyla   | Bovidae         | 171     | 3   | 1   | 0  | 1  | 0  | 1  | 0  |
| <i>Beatragus hunteri</i>          | Artiodactyla   | Bovidae         | 80      | 3   | 1   | 0  | 1  | 0  | 1  | 0  |
| <i>Cephalophus adersi</i>         | Artiodactyla   | Bovidae         | 9.2     | 2   | 1   | 0  | 1  | 1  | 0  | 0  |
| <i>Cephalophus harveyi</i>        | Artiodactyla   | Bovidae         | 14.5    | 2   | 1   | 0  | 1  | 1  | 0  | 0  |
| <i>Cephalophus nigrifrons</i>     | Artiodactyla   | Bovidae         | 13.9    | 2   | 1   | 0  | 1  | 1  | 0  | 0  |
| <i>Cephalophus silvicultr</i>     | Artiodactyla   | Bovidae         | 72.5    | 2   | 1   | 0  | 1  | 1  | 0  | 0  |
| <i>Cephalophus weynsi</i>         | Artiodactyla   | Bovidae         | 17      | 2   | 1   | 0  | 1  | 1  | 0  | 0  |
| <i>Connochaetes taurinus</i>      | Artiodactyla   | Bovidae         | 180     | 3   | 1   | 0  | 1  | 0  | 1  | 0  |
| <i>Damaliscus korrigum</i>        | Artiodactyla   | Bovidae         | 112     | 3   | 1   | 0  | 1  | 0  | 1  | 0  |
| <i>Eudorcas thomsonii</i>         | Artiodactyla   | Bovidae         | 20.5    | 3   | 1   | 0  | 1  | 0  | 0  | 0  |
| <i>Hippotragus equinus</i>        | Artiodactyla   | Bovidae         | 270     | 3   | 1   | 0  | 1  | 1  | 0  | 0  |
| <i>Hippotragus niger</i>          | Artiodactyla   | Bovidae         | 227.5   | 3   | 1   | 0  | 1  | 1  | 0  | 0  |
| <i>Kobus ellipsiprymnus</i>       | Artiodactyla   | Bovidae         | 210     | 3   | 1   | 0  | 1  | 1  | 0  | 0  |
| <i>Litocranius walleri</i>        | Artiodactyla   | Bovidae         | 38      | 2   | 1   | 0  | 1  | 0  | 0  | 0  |
| <i>Madoqua guentheri</i>          | Artiodactyla   | Bovidae         | 7.5     | 2   | 1   | 0  | 1  | 0  | 0  | 0  |
| <i>Madoqua kirkii</i>             | Artiodactyla   | Bovidae         | 5.3     | 2   | 1   | 0  | 1  | 0  | 0  | 0  |
| <i>Nanger granti</i>              | Artiodactyla   | Bovidae         | 55      | 3   | 1   | 0  | 1  | 0  | 0  | 0  |
| <i>Neotragus moschatus</i>        | Artiodactyla   | Bovidae         | 6.5     | 2   | 1   | 0  | 1  | 0  | 0  | 0  |
| <i>Oreotragus oreotragus</i>      | Artiodactyla   | Bovidae         | 13      | 3   | 1   | 0  | 1  | 0  | 0  | 0  |
| <i>Oryx beisa</i>                 | Artiodactyla   | Bovidae         | 169     | 3   | 1   | 0  | 1  | 1  | 1  | 0  |
| <i>Ourebia ourebi</i>             | Artiodactyla   | Bovidae         | 17.2    | 3   | 1   | 0  | 1  | 0  | 0  | 0  |
| <i>Philantomba monticola</i>      | Artiodactyla   | Bovidae         | 6.2     | 1   | 1   | 0  | 1  | 0  | 0  | 0  |
| <i>Raphicerus campestris</i>      | Artiodactyla   | Bovidae         | 10.5    | 3   | 1   | 0  | 1  | 0  | 0  | 0  |
| <i>Redunca fulvorufula</i>        | Artiodactyla   | Bovidae         | 29.5    | 3   | 1   | 0  | 1  | 1  | 0  | 1  |
| <i>Redunca redunca</i>            | Artiodactyla   | Bovidae         | 44.1    | 3   | 1   | 0  | 1  | 1  | 0  | 1  |
| <i>Sylvicapra grimmia</i>         | Artiodactyla   | Bovidae         | 19.5    | 2   | 1   | 0  | 1  | 0  | 0  | 0  |
| <i>Syncerus caffer</i>            | Artiodactyla   | Bovidae         | 580     | 3   | 1   | 0  | 1  | 0  | 1  | 0  |
| <i>Taurotragus oryx</i>           | Artiodactyla   | Bovidae         | 570     | 3   | 1   | 0  | 1  | 0  | 0  | 0  |
| <i>Tragelaphus eurycerus</i>      | Artiodactyla   | Bovidae         | 329     | 2   | 1   | 0  | 1  | 0  | 0  | 0  |
| <i>Tragelaphus imberbis</i>       | Artiodactyla   | Bovidae         | 70      | 2   | 1   | 0  | 1  | 0  | 0  | 0  |
| <i>Tragelaphus scriptus</i>       | Artiodactyla   | Bovidae         | 43.3    | 2   | 1   | 0  | 1  | 0  | 0  | 0  |
| <i>Tragelaphus spekii</i>         | Artiodactyla   | Bovidae         | 78      | 2   | 1   | 0  | 1  | 0  | 0  | 0  |
| <i>Tragelaphus strepsiceros</i>   | Artiodactyla   | Bovidae         | 213.5   | 2   | 1   | 0  | 1  | 0  | 0  | 0  |
| <i>Giraffa camelopardalis</i>     | Artiodactyla   | Giraffidae      | 850     | 1   | 1   | 0  | 1  | 0  | 0  | 0  |
| <i>Hippopotamus amphibius</i>     | Artiodactyla   | Hippopotamidae  | 1417.5  | 2   | 1   | 0  | 1  | 1  | 0  | 0  |
| <i>Hylochoerus meinertzhageni</i> | Artiodactyla   | Suidae          | 188.5   | 2   | 2   | 0  | 1  | 1  | 0  | 1  |
| <i>Phacochoerus aethiopicus</i>   | Artiodactyla   | Suidae          | 50      | 3   | 3   | 0  | 0  | 0  | 1  | 1  |
| <i>Phacochoerus africanus</i>     | Artiodactyla   | Suidae          | 82.5    | 3   | 3   | 0  | 0  | 0  | 1  | 1  |
| <i>Potamochoerus larvatus</i>     | Artiodactyla   | Suidae          | 97.5    | 1   | 1   | 0  | 0  | 1  | 0  | 0  |
| <i>Equus burchellii</i>           | Perissodactyla | Equidae         | 276     | 3   | 1   | 0  | 1  | 0  | 1  | 1  |
| <i>Equus grevyi</i>               | Perissodactyla | Equidae         | 408     | 3   | 1   | 0  | 1  | 0  | 1  | 1  |
| <i>Diceros bicornis</i>           | Perissodactyla | Rhinocerotidae  | 1180.5  | 2   | 1   | 1  | 1  | 0  | 0  | 0  |
| <i>Ceratotherium simum</i>        | Perissodactyla | Rhinocerotidae  | 2177.6  | 3   | 1   | 0  | 1  | 0  | 1  | 1  |
| <i>Cercocebus galeritus</i>       | Primates       | Cercopithecidae | 7.8     | 1   | 1   | 0  | 0  | 0  | 0  | 0  |
| <i>Cercopithecus ascanius</i>     | Primates       | Cercopithecidae | 3.5     | 1   | 1   | 0  | 0  | 0  | 0  | 0  |
| <i>Cercopithecus mitis</i>        | Primates       | Cercopithecidae | 5       | 1   | 1   | 0  | 0  | 0  | 0  | 0  |
| <i>Cercopithecus neglectus</i>    | Primates       | Cercopithecidae | 5.5     | 1   | 1   | 0  | 0  | 0  | 0  | 0  |
| <i>Chlorocebus pygerythrus</i>    | Primates       | Cercopithecidae | 5.2     | 1   | 1   | 0  | 0  | 0  | 0  | 0  |
| <i>Chlorocebus tantalus</i>       | Primates       | Cercopithecidae | 4.2     | 1   | 1   | 0  | 0  | 0  | 0  | 0  |
| <i>Colobus angolensis</i>         | Primates       | Cercopithecidae | 9.8     | 1   | 1   | 1  | 0  | 0  | 0  | 0  |
| <i>Colobus guereza</i>            | Primates       | Cercopithecidae | 10.6    | 1   | 1   | 1  | 0  | 0  | 0  | 0  |
| <i>Erythrocebus patas</i>         | Primates       | Cercopithecidae | 8.1     | 1   | 1   | 0  | 0  | 0  | 0  | 0  |
| <i>Papio anubis</i>               | Primates       | Cercopithecidae | 19.4    | 1   | 1   | 0  | 0  | 0  | 0  | 0  |
| <i>Papio cynocephalus</i>         | Primates       | Cercopithecidae | 21      | 1   | 1   | 0  | 0  | 0  | 0  | 0  |
| <i>Ptilocolobus rufomitratu</i>   | Primates       | Cercopithecidae | 8       | 1   | 1   | 1  | 0  | 0  | 0  | 0  |
| <i>Galago gallarum</i>            | Primates       | Galagidae       | 0.2     | 1   | 1   | 0  | 0  | 0  | 0  | 0  |
| <i>Galago senegalensis</i>        | Primates       | Galagidae       | 0.2     | 1   | 1   | 0  | 0  | 0  | 0  | 0  |
| <i>Galago zanzibaricus</i>        | Primates       | Galagidae       | 0.1     | 1   | 1   | 0  | 0  | 0  | 0  | 0  |
| <i>Otolemur crassicaudatus</i>    | Primates       | Galagidae       | 1.5     | 1   | 1   | 0  | 0  | 0  | 0  | 0  |
| <i>Otolemur garnettii</i>         | Primates       | Galagidae       | 0.8     | 1   | 1   | 0  | 0  | 0  | 0  | 0  |
| <i>Perodicticus potto</i>         | Primates       | Lorisidae       | 1.1     | 1   | 1   | 0  | 0  | 0  | 0  | 0  |
| <i>Loxodonta africana</i>         | Proboscidea    | Elephantidae    | 3940    | 3   | 3   | 0  | 1  | 0  | 1  | 1  |



Table 4. Species occurrences.

| TAXON                             | ABD | EL | KK | MM | MR | MKE | NR | NV | SB | SH | SHP | TN | TV |
|-----------------------------------|-----|----|----|----|----|-----|----|----|----|----|-----|----|----|
| <i>Aepyceros melampus</i>         | 1   | 0  | 0  | 1  | 1  | 0   | 1  | 1  | 1  | 0  | 1   | 0  | 1  |
| <i>Alcelaphus buselaphus</i>      | 0   | 0  | 0  | 1  | 1  | 1   | 1  | 1  | 0  | 0  | 1   | 0  | 1  |
| <i>Beatragus hunteri</i>          | 0   | 0  | 0  | 0  | 0  | 0   | 0  | 0  | 0  | 0  | 0   | 1  | 1  |
| <i>Cephalophus adersi</i>         | 0   | 0  | 0  | 0  | 0  | 0   | 0  | 0  | 0  | 1  | 0   | 1  | 0  |
| <i>Cephalophus harveyi</i>        | 1   | 1  | 1  | 0  | 0  | 1   | 0  | 1  | 0  | 1  | 0   | 1  | 1  |
| <i>Cephalophus nigrifrons</i>     | 1   | 1  | 0  | 0  | 0  | 1   | 0  | 0  | 0  | 0  | 0   | 0  | 0  |
| <i>Cephalophus silvicultor</i>    | 0   | 0  | 1  | 0  | 0  | 0   | 0  | 0  | 0  | 0  | 0   | 0  | 0  |
| <i>Cephalophus weynsi</i>         | 0   | 1  | 1  | 0  | 0  | 0   | 0  | 1  | 0  | 0  | 0   | 0  | 0  |
| <i>Connochaetes taurinus</i>      | 0   | 0  | 0  | 1  | 0  | 0   | 1  | 1  | 0  | 0  | 1   | 0  | 0  |
| <i>Damaliscus korrigum</i>        | 0   | 0  | 0  | 1  | 0  | 0   | 0  | 0  | 0  | 0  | 1   | 1  | 0  |
| <i>Eudorcas thomsonii</i>         | 0   | 0  | 0  | 1  | 0  | 1   | 1  | 1  | 1  | 0  | 1   | 0  | 1  |
| <i>Hippotragus equinus</i>        | 0   | 0  | 0  | 1  | 0  | 0   | 0  | 0  | 0  | 0  | 0   | 0  | 0  |
| <i>Hippotragus niger</i>          | 0   | 0  | 0  | 0  | 0  | 0   | 0  | 0  | 0  | 1  | 0   | 0  | 0  |
| <i>Kobus ellipsiprymnus</i>       | 1   | 1  | 0  | 1  | 1  | 1   | 1  | 1  | 1  | 1  | 1   | 1  | 1  |
| <i>Litocranius walleri</i>        | 0   | 0  | 0  | 0  | 1  | 0   | 0  | 1  | 1  | 0  | 1   | 1  | 1  |
| <i>Madoqua guentheri</i>          | 0   | 0  | 0  | 0  | 1  | 0   | 0  | 0  | 1  | 0  | 0   | 1  | 0  |
| <i>Madoqua kirkii</i>             | 0   | 0  | 0  | 1  | 1  | 0   | 1  | 1  | 1  | 0  | 1   | 1  | 1  |
| <i>Nanger granti</i>              | 1   | 0  | 0  | 1  | 1  | 1   | 1  | 1  | 1  | 0  | 1   | 1  | 1  |
| <i>Neotragus moschatus</i>        | 1   | 0  | 1  | 0  | 1  | 1   | 1  | 1  | 0  | 1  | 0   | 1  | 0  |
| <i>Oreotragus oreotragus</i>      | 1   | 0  | 0  | 1  | 0  | 0   | 1  | 1  | 1  | 0  | 1   | 0  | 1  |
| <i>Oryx beisa</i>                 | 0   | 0  | 0  | 1  | 1  | 0   | 1  | 0  | 1  | 0  | 1   | 1  | 1  |
| <i>Ourebia ourebi</i>             | 0   | 0  | 0  | 1  | 1  | 0   | 1  | 0  | 0  | 0  | 1   | 0  | 0  |
| <i>Philantomba monticola</i>      | 1   | 1  | 1  | 1  | 1  | 0   | 1  | 1  | 0  | 1  | 0   | 1  | 0  |
| <i>Raphicerus campestris</i>      | 0   | 0  | 0  | 1  | 1  | 1   | 1  | 1  | 1  | 0  | 1   | 1  | 1  |
| <i>Redunca fulvorufula</i>        | 0   | 0  | 0  | 0  | 0  | 0   | 1  | 1  | 0  | 0  | 0   | 0  | 0  |
| <i>Redunca redunca</i>            | 0   | 0  | 0  | 1  | 1  | 1   | 1  | 1  | 0  | 0  | 1   | 0  | 1  |
| <i>Sylvicapra grimmia</i>         | 1   | 1  | 1  | 1  | 1  | 1   | 1  | 1  | 1  | 1  | 1   | 0  | 1  |
| <i>Syncerus caffer</i>            | 1   | 0  | 0  | 1  | 1  | 1   | 1  | 1  | 1  | 1  | 1   | 1  | 1  |
| <i>Taurotragus oryx</i>           | 1   | 0  | 0  | 1  | 1  | 1   | 1  | 1  | 1  | 0  | 1   | 1  | 1  |
| <i>Tragelaphus eurycerus</i>      | 1   | 0  | 0  | 0  | 0  | 0   | 0  | 0  | 0  | 0  | 0   | 0  | 0  |
| <i>Tragelaphus imberbis</i>       | 0   | 0  | 0  | 0  | 1  | 0   | 0  | 0  | 1  | 0  | 1   | 1  | 1  |
| <i>Tragelaphus scriptus</i>       | 1   | 1  | 1  | 1  | 1  | 1   | 1  | 1  | 1  | 1  | 1   | 1  | 1  |
| <i>Tragelaphus spekii</i>         | 0   | 0  | 1  | 0  | 0  | 0   | 0  | 0  | 0  | 0  | 0   | 0  | 0  |
| <i>Tragelaphus strepsiceros</i>   | 0   | 0  | 0  | 1  | 1  | 0   | 0  | 1  | 1  | 0  | 1   | 0  | 1  |
| <i>Giraffa camelopardalis</i>     | 0   | 1  | 0  | 1  | 1  | 1   | 1  | 1  | 1  | 0  | 1   | 1  | 1  |
| <i>Hippopotamus amphibius</i>     | 1   | 0  | 0  | 1  | 1  | 0   | 1  | 1  | 1  | 0  | 0   | 1  | 1  |
| <i>Hylochoerus meinertzhageni</i> | 1   | 1  | 1  | 1  | 1  | 0   | 0  | 0  | 0  | 0  | 0   | 1  | 0  |
| <i>Phacochoerus aethiopicus</i>   | 0   | 0  | 0  | 0  | 1  | 1   | 0  | 0  | 0  | 0  | 0   | 1  | 0  |
| <i>Phacochoerus africanus</i>     | 1   | 0  | 1  | 1  | 1  | 0   | 1  | 1  | 1  | 1  | 1   | 1  | 1  |
| <i>Potamochoerus larvatus</i>     | 0   | 0  | 1  | 1  | 1  | 1   | 0  | 1  | 0  | 1  | 0   | 1  | 1  |
| <i>Equus burchellii</i>           | 1   | 1  | 0  | 1  | 1  | 1   | 1  | 1  | 1  | 0  | 1   | 1  | 1  |
| <i>Equus grevyi</i>               | 0   | 0  | 0  | 0  | 1  | 0   | 0  | 0  | 1  | 0  | 0   | 1  | 1  |
| <i>Diceros bicornis</i>           | 1   | 0  | 0  | 1  | 1  | 0   | 1  | 0  | 1  | 0  | 1   | 1  | 1  |
| <i>Ceratotherium simum</i>        | 0   | 0  | 0  | 0  | 1  | 0   | 1  | 1  | 0  | 0  | 0   | 0  | 0  |
| <i>Cercocebus galeritus</i>       | 0   | 0  | 0  | 0  | 0  | 0   | 0  | 0  | 0  | 0  | 0   | 1  | 0  |
| <i>Cercopithecus ascanius</i>     | 0   | 0  | 1  | 0  | 0  | 0   | 0  | 0  | 0  | 0  | 0   | 0  | 0  |
| <i>Cercopithecus mitis</i>        | 1   | 1  | 1  | 1  | 1  | 1   | 1  | 1  | 1  | 1  | 1   | 1  | 1  |
| <i>Cercopithecus neglectus</i>    | 0   | 1  | 1  | 0  | 0  | 0   | 0  | 0  | 0  | 0  | 0   | 0  | 0  |
| <i>Chlorocebus pygerythrus</i>    | 1   | 1  | 1  | 1  | 1  | 1   | 1  | 1  | 1  | 1  | 1   | 1  | 1  |
| <i>Chlorocebus tantalus</i>       | 0   | 0  | 0  | 0  | 0  | 0   | 0  | 0  | 0  | 0  | 0   | 0  | 0  |
| <i>Colobus angolensis</i>         | 0   | 0  | 0  | 0  | 0  | 0   | 0  | 0  | 0  | 1  | 0   | 0  | 0  |
| <i>Colobus guereza</i>            | 1   | 1  | 1  | 1  | 1  | 1   | 1  | 1  | 0  | 1  | 1   | 0  | 0  |
| <i>Erythrocebus patas</i>         | 0   | 0  | 0  | 1  | 1  | 0   | 0  | 0  | 1  | 0  | 0   | 0  | 0  |
| <i>Papio anubis</i>               | 1   | 1  | 1  | 1  | 1  | 1   | 1  | 1  | 1  | 1  | 1   | 1  | 1  |
| <i>Papio cynocephalus</i>         | 0   | 0  | 0  | 0  | 0  | 0   | 0  | 0  | 0  | 1  | 0   | 1  | 1  |
| <i>Ptilocolobus rufomitratu</i>   | 0   | 0  | 0  | 0  | 0  | 0   | 0  | 0  | 0  | 0  | 0   | 1  | 0  |
| <i>Galago gallarum</i>            | 0   | 0  | 0  | 0  | 1  | 0   | 0  | 0  | 0  | 0  | 0   | 1  | 0  |
| <i>Galago senegalensis</i>        | 0   | 1  | 1  | 1  | 1  | 0   | 1  | 0  | 1  | 1  | 0   | 1  | 1  |
| <i>Galago zanzibaricus</i>        | 0   | 0  | 0  | 0  | 0  | 0   | 0  | 0  | 0  | 1  | 0   | 1  | 1  |
| <i>Otolemur crassicaudatus</i>    | 0   | 0  | 1  | 1  | 1  | 0   | 1  | 0  | 1  | 1  | 0   | 1  | 1  |
| <i>Otolemur garnettii</i>         | 0   | 0  | 0  | 0  | 0  | 0   | 0  | 0  | 0  | 0  | 0   | 0  | 1  |
| <i>Perodicticus potto</i>         | 0   | 1  | 1  | 0  | 0  | 1   | 0  | 0  | 0  | 0  | 0   | 0  | 0  |
| <i>Loxodonta africana</i>         | 1   | 0  | 0  | 1  | 1  | 1   | 0  | 0  | 1  | 0  | 1   | 1  | 1  |

**Table 5. Values of the climate and environmental variables. In order to be comparable, all precipitation variables are reported in mm per annum (for example, PREC\_MIN is precipitation of the driest month in mm times 12 months), temperature is reported in deg. Celsius, NPP is reported in gC per m2, and NDVI is an index between 0 and 1.**

| SITE           | ABD   | EL    | KK    | MM    | MR    | MKE   | NR    | NV    | SB    | SH    | SHP   | TN    | TV    |
|----------------|-------|-------|-------|-------|-------|-------|-------|-------|-------|-------|-------|-------|-------|
| ELEV           | 2712  | 2504  | 1793  | 1601  | 421   | 2686  | 1628  | 1974  | 883   | 242   | 1120  | 77    | 544   |
| TEMP           | 11.9  | 15.0  | 18.8  | 19.5  | 25.6  | 12.4  | 19.0  | 16.7  | 23.6  | 24.5  | 22.6  | 27.3  | 24.5  |
| TEMP_MIN       | 10.4  | 14.0  | 17.7  | 18.2  | 23.8  | 11.1  | 16.7  | 14.8  | 22.6  | 22.3  | 20.5  | 25.2  | 22.1  |
| TEMP_low       | 5.5   | 8.3   | 10.7  | 12.7  | 18.4  | 5.9   | 12.9  | 9.6   | 15.4  | 20.3  | 16.2  | 22.0  | 19.0  |
| TEMP_low_MIN   | 4.3   | 8.0   | 9.9   | 11.6  | 16.7  | 4.8   | 11.0  | 8.4   | 14.6  | 18.3  | 14.5  | 19.9  | 17.1  |
| TEMP_MAX       | 13.1  | 16.1  | 19.8  | 20.6  | 27.2  | 13.6  | 20.7  | 18.2  | 24.8  | 26.6  | 24.2  | 29.1  | 26.5  |
| TEMP_high      | 18.4  | 21.8  | 27.0  | 26.4  | 32.9  | 19.1  | 25.3  | 23.9  | 32.0  | 28.8  | 29.2  | 32.6  | 30.1  |
| TEMP_high_MAX  | 20.7  | 23.8  | 28.5  | 27.8  | 34.8  | 21.2  | 27.8  | 26.5  | 33.5  | 31.3  | 31.3  | 34.8  | 32.6  |
| PREC           | 1656  | 1606  | 1779  | 1038  | 430   | 1594  | 742   | 709   | 504   | 1102  | 567   | 508   | 714   |
| PREC_MIN       | 700   | 491   | 751   | 334   | 4     | 596   | 127   | 273   | 47    | 251   | 71    | 153   | 133   |
| PREC_low       | 937   | 1127  | 1461  | 899   | 306   | 807   | 635   | 669   | 432   | 1003  | 474   | 451   | 504   |
| PREC_MAX       | 3637  | 2514  | 2910  | 2034  | 1728  | 3461  | 1953  | 1859  | 1619  | 2665  | 1563  | 1086  | 1754  |
| PREC_high      | 2325  | 1868  | 1980  | 1352  | 656   | 2174  | 840   | 826   | 689   | 1185  | 798   | 650   | 1117  |
| NPP            | 1576  | 1846  | 2079  | 1494  | 745   | 1620  | 1167  | 1126  | 853   | 1557  | 941   | 859   | 1133  |
| NPP_MIN_MIN    | 1115  | 835   | 1178  | 597   | 8     | 980   | 243   | 497   | 92    | 461   | 138   | 290   | 254   |
| NPP_low_low    | 1022  | 1257  | 1469  | 1349  | 552   | 1054  | 1032  | 1076  | 748   | 1459  | 810   | 776   | 853   |
| NPP_low_MIN    | 1022  | 835   | 1178  | 597   | 8     | 980   | 243   | 497   | 92    | 461   | 138   | 290   | 254   |
| NPP_MIN_low    | 1390  | 1581  | 1863  | 1349  | 552   | 1244  | 1032  | 1076  | 748   | 1459  | 810   | 776   | 853   |
| NDVI           | 0.714 | 0.683 | 0.751 | 0.533 | 0.371 | 0.633 | 0.417 | 0.457 | 0.298 | 0.622 | 0.537 | 0.389 | 0.344 |
| NDVI_MIN9y     | 0.391 | 0.298 | 0.561 | 0.276 | 0.227 | 0.268 | 0.198 | 0.257 | 0.181 | 0.431 | 0.338 | 0.235 | 0.202 |
| NDVI_low1y     | 0.484 | 0.537 | 0.642 | 0.341 | 0.245 | 0.435 | 0.258 | 0.333 | 0.203 | 0.487 | 0.389 | 0.277 | 0.231 |
| NDVI_low1y_MIN | 0.692 | 0.654 | 0.734 | 0.483 | 0.329 | 0.604 | 0.332 | 0.357 | 0.228 | 0.551 | 0.450 | 0.331 | 0.272 |
| NDVI_low       | 0.690 | 0.659 | 0.741 | 0.502 | 0.345 | 0.602 | 0.390 | 0.436 | 0.277 | 0.596 | 0.509 | 0.368 | 0.322 |
| NDVI_low_MIN   | 0.576 | 0.592 | 0.666 | 0.376 | 0.246 | 0.526 | 0.294 | 0.382 | 0.208 | 0.537 | 0.396 | 0.298 | 0.236 |
| species_count  | 23    | 17    | 20    | 35    | 38    | 23    | 31    | 31    | 29    | 20    | 29    | 37    | 35    |

**Table 6. Climate and environmental variables.**

|                |                                                                            |
|----------------|----------------------------------------------------------------------------|
| PREC           | Annual precipitation                                                       |
| PREC_MIN       | Minimum over monthly precipitation (driest month of the year)              |
| PREC_low       | Minimum annual precipitation spatially (driest place)                      |
| PREC_MAX       | Maximum over monthly precipitation (wettest month of the year)             |
| PREC_high      | Maximum annual precipitation spatially (wettest place)                     |
| NPP            | Standard computed Net Primary Productivity                                 |
| NPP_MIN_MIN    | Coldest month with driest month                                            |
| NPP_low_low    | Coldest days with driest place                                             |
| NPP_low_MIN    | Coldest days with driest month                                             |
| NPP_MIN_low    | Coldest month with driest place                                            |
| NDVI           | Observed annual average Normalized Difference Vegetation Index             |
| NDVI_MIN9y     | Global minimum over 9 years                                                |
| NDVI_low1y     | Average over yearly minimums                                               |
| NDVI_low1y_MIN | Minimum over yearly averages                                               |
| NDVI_low       | Average over monthly minimums                                              |
| NDVI_low_MIN   | Minimum over monthly minimums                                              |
| TEMP           | Average temperature                                                        |
| TEMP_MIN       | Minimum over monthly means (coldest month of the year)                     |
| TEMP_low       | Average over monthly minimums (average coldest day of the month over year) |
| TEMP_low_MIN   | Minimum over monthly minimums (coldest day of the coldest month)           |
| TEMP_MAX       | Maximum over monthly means (hottest month of the year)                     |
| TEMP_high      | Average over monthly maximums (average hottest day of the month over year) |
| TEMP_high_MAX  | Maximum over monthly maximums (hottest day of the hottest month)           |

1. Hijmans RJ, Cameron SE, Parra JL, Jones PG, Jarvis A (2005) Very high resolution interpolated climate surfaces for global land areas. *International Journal of Climatology* 25:1965–1978.
2. Leith H (1972) Modeling the primary productivity of the world in *Primary productivity of the biosphere*, eds. Leith H, Whittaker RH. (Springer), pp. 237–263.
3. Liu L et al. (2012) Dental functional traits of mammals resolve productivity in terrestrial ecosystems past and present. *Proceedings of the Royal Society B* 279(1739):2793–2799.
4. Yi C et al. (2010) Climate control of terrestrial carbon exchange across biomes and continents. *Environmental Research Letters* 5(3):034007.
5. Huete A, Justice C, Liu H (1994) Development of vegetation and soil indices for MODIS-EOS. *Remote Sensing of the Environment* 49:224–234.
6. Tóth AB, Lyons SK, Behrensmeyer AK (2014) Mammals of Kenya's protected areas from 1888 to 2013. *Ecology* 95(6):1711–1711.
7. Jones KE et al. (2009) PanTHERIA: a species-level database of life history, ecology, and geography of extant and recently extinct mammals. *Ecology* 90(2648).
8. Smith FA et al. (2003) Body mass of late quaternary mammals. *Ecology* 84:3402 (updated version obtained from the authors).
9. Fortelius M et al. (2002) Fossil mammals resolve regional patterns of eurasian climate change during 20 million years. *Evolutionary Ecology Research* 4:1005–1016.
10. Fortelius M et al. (2014) Evolution of neogene mammals in eurasia: environmental forcing and biotic interactions. *Annual Reviews of Earth and Planetary Science* 42:579–604.
11. Efron B, Hastie T, Johnstone I, Tibshirani R (2004) Least angle regression. *Annals of Statistics* 32(2):407–499.
12. Žliobaitė I, Tatti N (2016) A note on adjusting R2 for using with cross-validation. *arXiv* 1605.01703.
13. Jernvall J (1995) Mammalian molar cusp patterns: Developmental mechanisms of diversity. *Acta Zoologica Fennica* 198:1–61.
14. Jernvall J, Fortelius M (2002) Common mammals drive the evolutionary increase of hypsodonty in the neogene. *Nature* 417:538–540.
15. Fortelius M (1981) Functional aspects of occlusal cheek-tooth morphology in hypsodont non-ruminant ungulates in *Proc. of International Symposium on Concept and Method in Palaeontology, Barcelona*. pp. 153–162.
16. Thenius E (1989) Zähne und gebiß der saugetiere in *Handbook of Zoology, Mammalia*, eds. Niethammer J, Schliemann H, Starck D. (Walter de Gruyter, Berlin) Vol. VIII, pp. 1–513.
17. Kavanagh K, Evans A, Jernvall J (2007) Predicting evolutionary patterns of mammalian teeth from development. *Nature* 449:427–432.
